# Supplementary material
Source: PubMed Central journal article supplement (PMC3945774)
Supplement: mmc1.pdf [file mmc1.pdf]

# Supporting Material

## Mechanical Stability and Reversible Fracture of Vault Particles

Aida Llauro,† Pablo Guerra,‡ Nerea Irigoyen,§ José F. Rodríguez,¶ Núria Verdager,‡ Pedro J. de Pablo,†,\*

†Departamento de Física de la Materia Condensada, UAM, Francisco Tomás y Valiente 7,28049-Madrid, Spain.

‡Institut de Biologia Molecular de Barcelona, CSIC. Baldiri i Reixac 10, 08028-Barcelona, Spain.

§Division of Virology, Department of Pathology, University of Cambridge, Tennis Court, Cambridge CB2 1QP, United Kingdom.

¶Centro Nacional de Biotecnología, CSIC, Calle Darwin nº 3, 28049-Madrid, Spain.

\*Correspondence: [p.j.depablo@uam.es](mailto:p.j.depablo@uam.es)

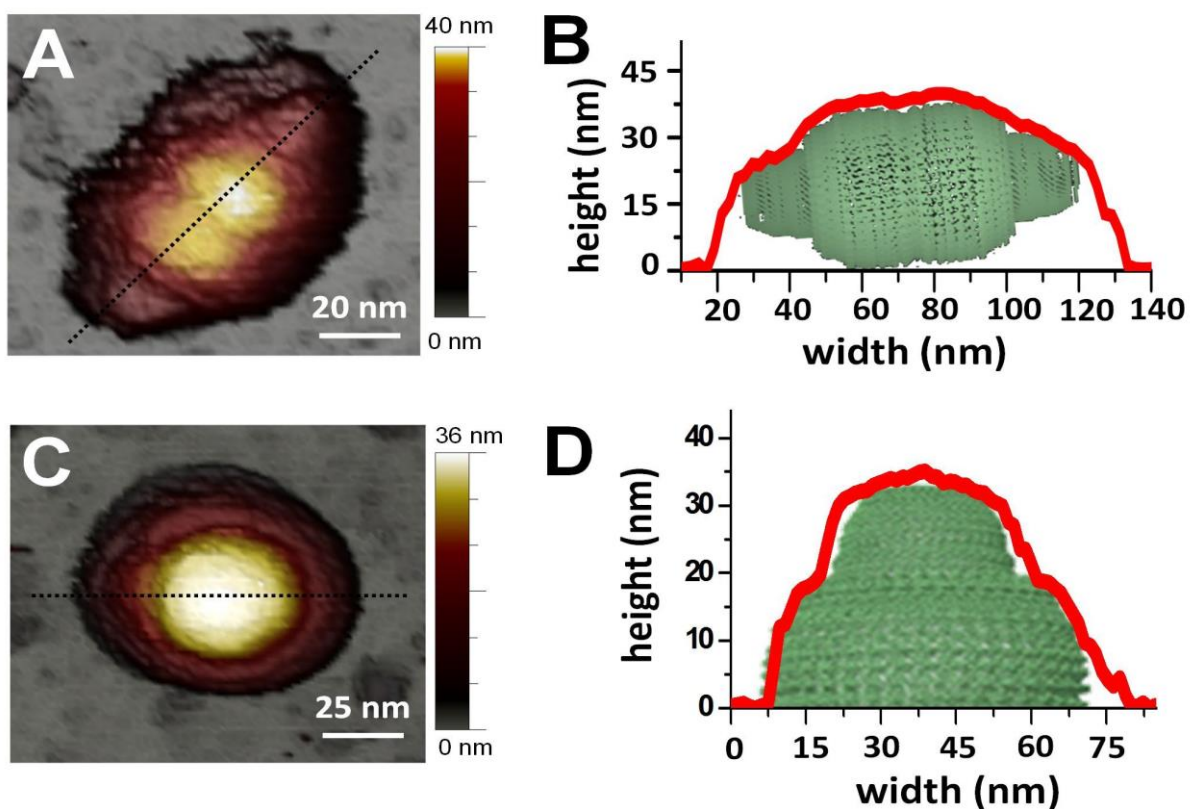

**FIGURE S1. High-resolution AFM topographies of an entire reclining particle and a half-vault.** (A) Topographical image of a reclining particle. (B) Longitudinal profile taken along the dotted black line in Fig. A. The height profile (*red line*) shows an excellent agreement with the X-Ray data of the vault structure. In this case, the vault is tilted about 5 degrees from the substrate. (C) AFM topography of a half vault with the cap facing up. (D) Profile taken along the dotted black line in Fig. C. Again, the dimensions agree with those obtained by X-Ray and EM.<sup>[3]</sup>

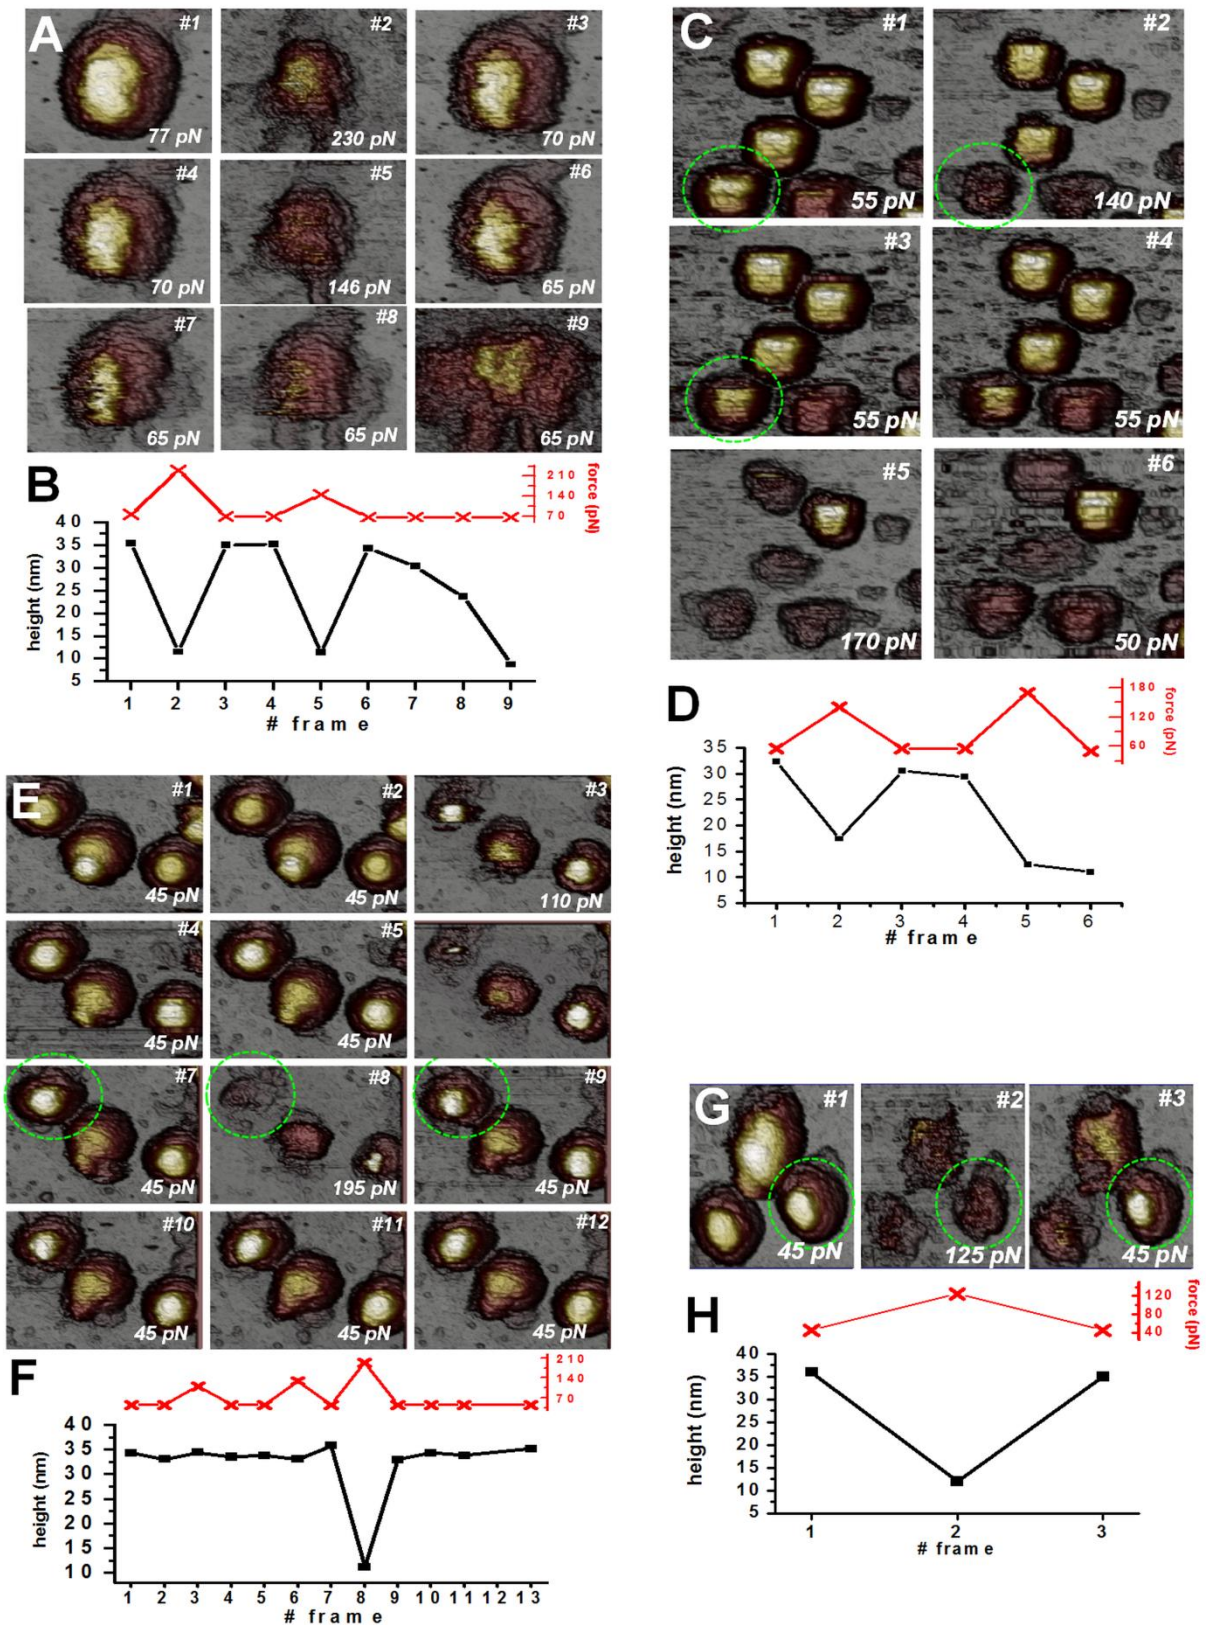

**FIGURE S2. Half-vault deformation depending on force imaging.** (A) Topographical images are time ordered and labeled with its corresponding imaging force. (B) (*top*) Imaging force evolution of Fig. S2 A. (*bottom*) Maximal height evolution of Fig. S2 A. (C-D), (E-F), and (G-H) correspond, respectively, to three more cases. The height evolution for these cases accounts for the half-vault circled with a green dotted line.

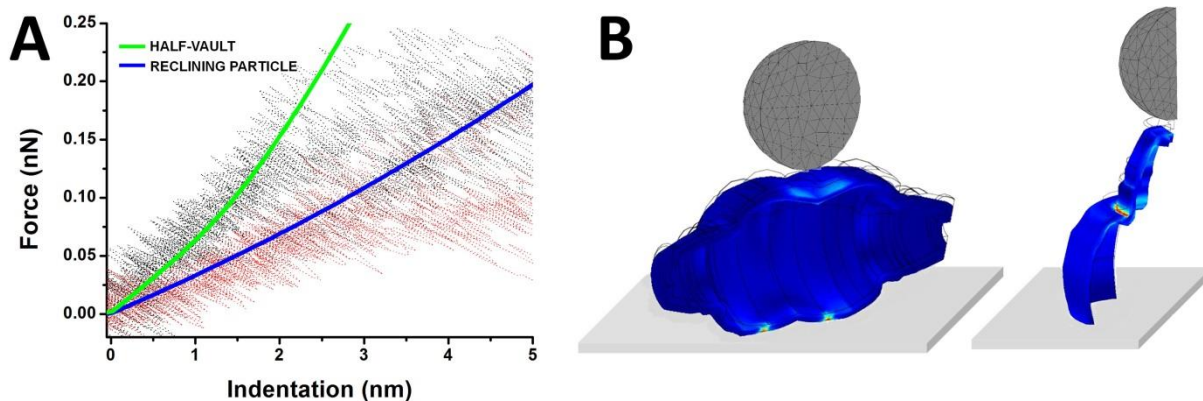

**FIGURE S3. Finite Element Analysis.** (A) FIC obtained in the Finite Element simulation for a half-vault (*green*) and a reclining particle (*blue*) when Young's modulus was set to  $E=700$  MPa. On the background we have overlaid the experimental curves for 26 different half-vaults (black) and 13 different reclining particles (red). (B) (*left*) Image of a half segment of a reclining particle with a 6 nm indentation; again, the colors indicate the von Misses stress distribution. (*right*) Image of a quarter segment of a half-vault with a 6 nm indentation, the colors indicating the distribution of the von Misses stress.

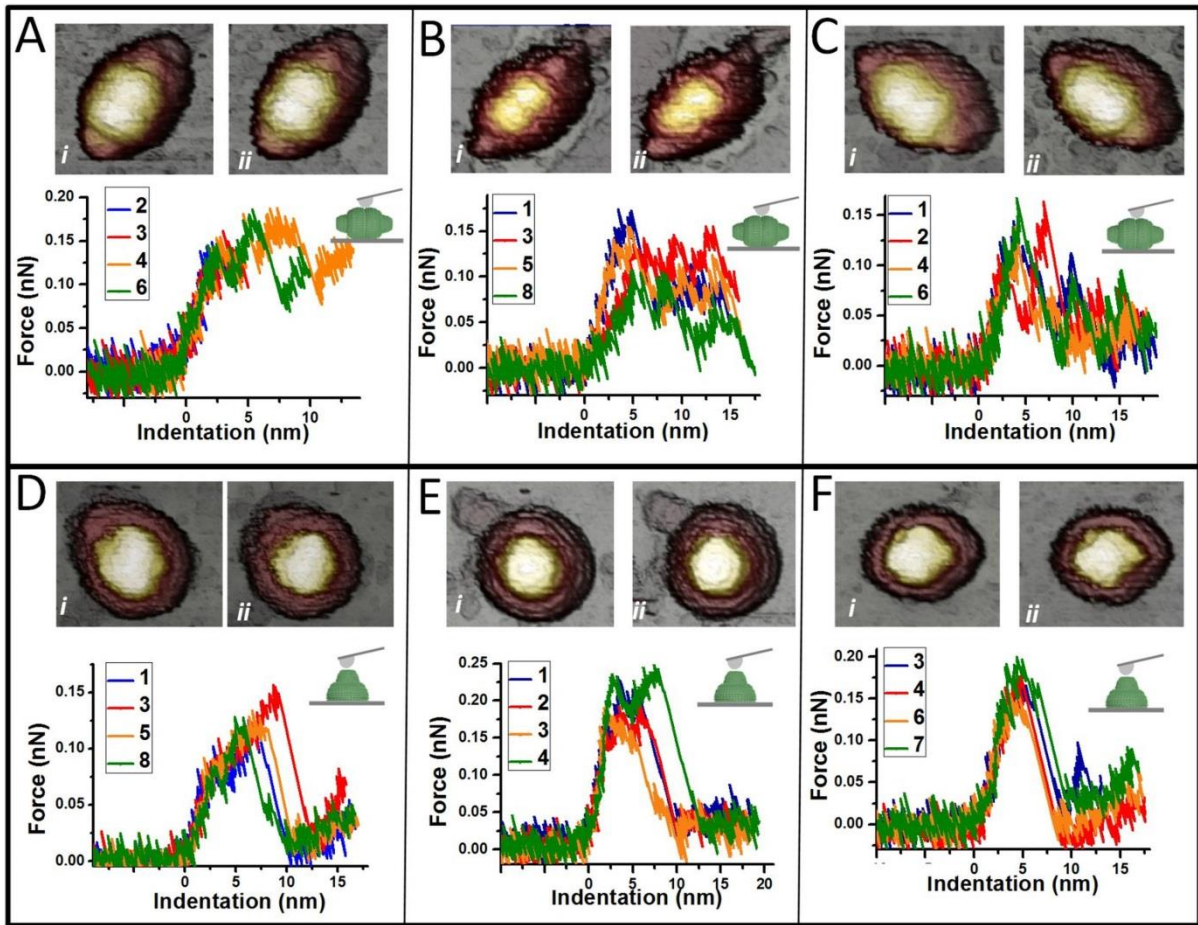

**FIGURE S4. Cyclic loading.** (A) Some of the FIC performed on top of the reclining particle shown in *i*. The numbers in the legend indicate the order of the curves. The image of the particle after the cyclic loading is represented in *ii*. (B, C) Two more examples, as in A. (D, E, F) Cycle loading experiments performed on half-vaults.

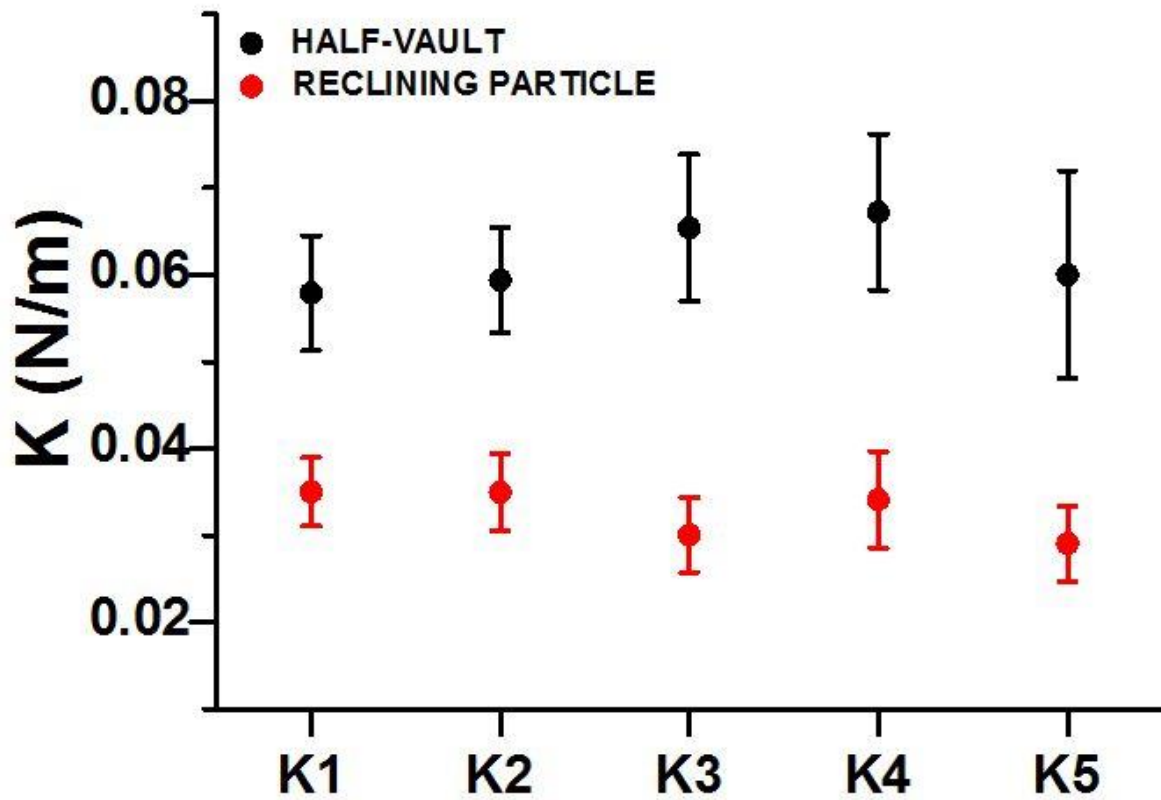

**FIGURE S5. Evolution of the spring constant.** The graph shows the evolution of the average spring constant value during the first indentation cycle (corresponding to 5 consecutive FICs). The values were obtained from 21 half-vaults and 13 reclining particles, respectively. Each FIC was performed beyond the breaking limit.

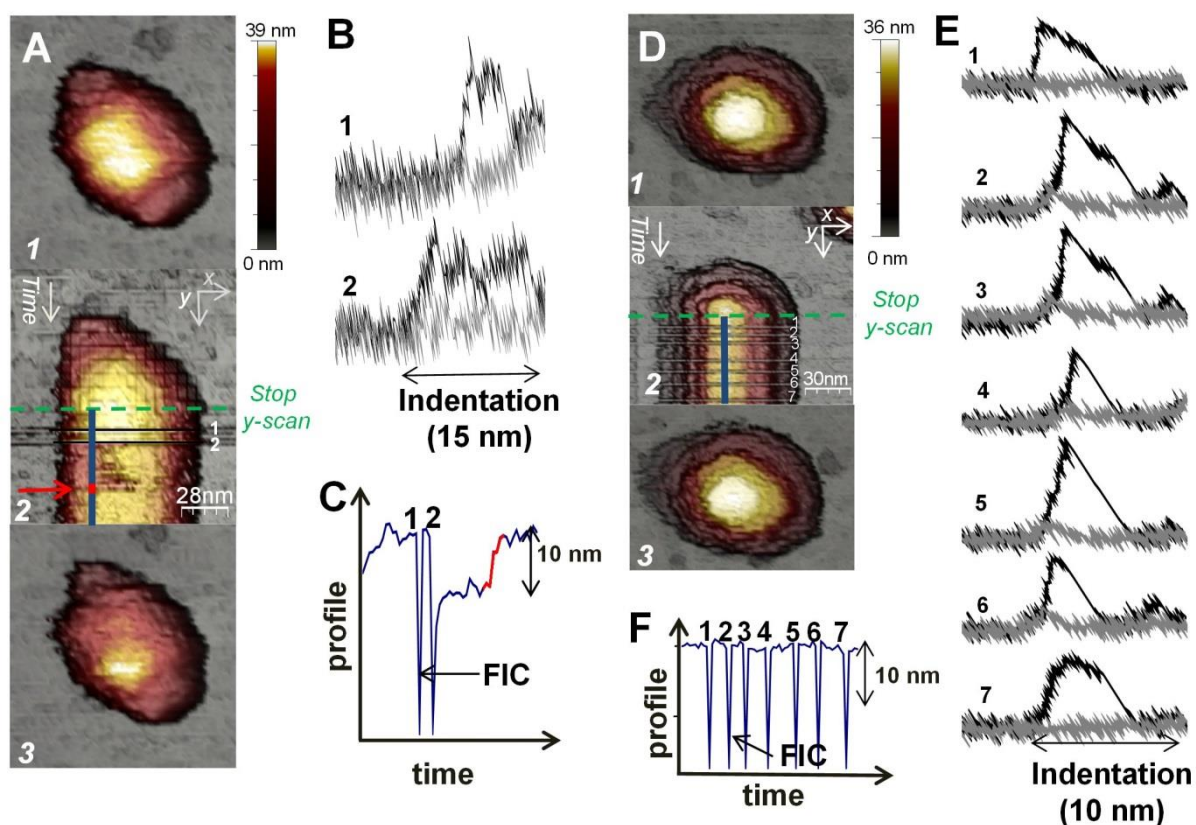

**FIGURE S6. Monitoring of the topography in a stopped y-scan** (A) Image of a reclining particle: (1) before the indentations, (2) during the indentations, and (3) after the indentations. All images were taken from top to bottom. In figure A 2, the dashed green line indicates the place where the tip stopped scanning in the y-direction. Therefore, from this line, the tip was placed on top of the structure and FICs started. Each black line in figure A 2 corresponds to a different FIC. After the second indentation, the structure of the particle was damaged, as a partial loss in height was observed (darker zone on top of the structure). Further imaging of this profile showed a recovery of the structure (*red arrow*). (B) The indentations performed on the top of the structure, the number of each curve corresponding to the order in which they were performed. (C) Topographic profile corresponding to the solid blue line depicted in figure A 2. In this profile, each FIC is represented as a sharp decrease. After the second FIC, the structure lost 10 nm in height that was later recovered (*red line*). (D, E, F) The same experiment performed on a half-vault. In this case, the particle does not display any topographical changes. However, some backward curves present a recovery (2, 3, 4, 5, and 6) whereas others do not (1 and 7). These latter cases correspond to recoveries occurring during the non-contact part of the curve (flattened region), which we classified as medium recovery times ( $650\text{ms} < RT < 2\text{s}$ ).

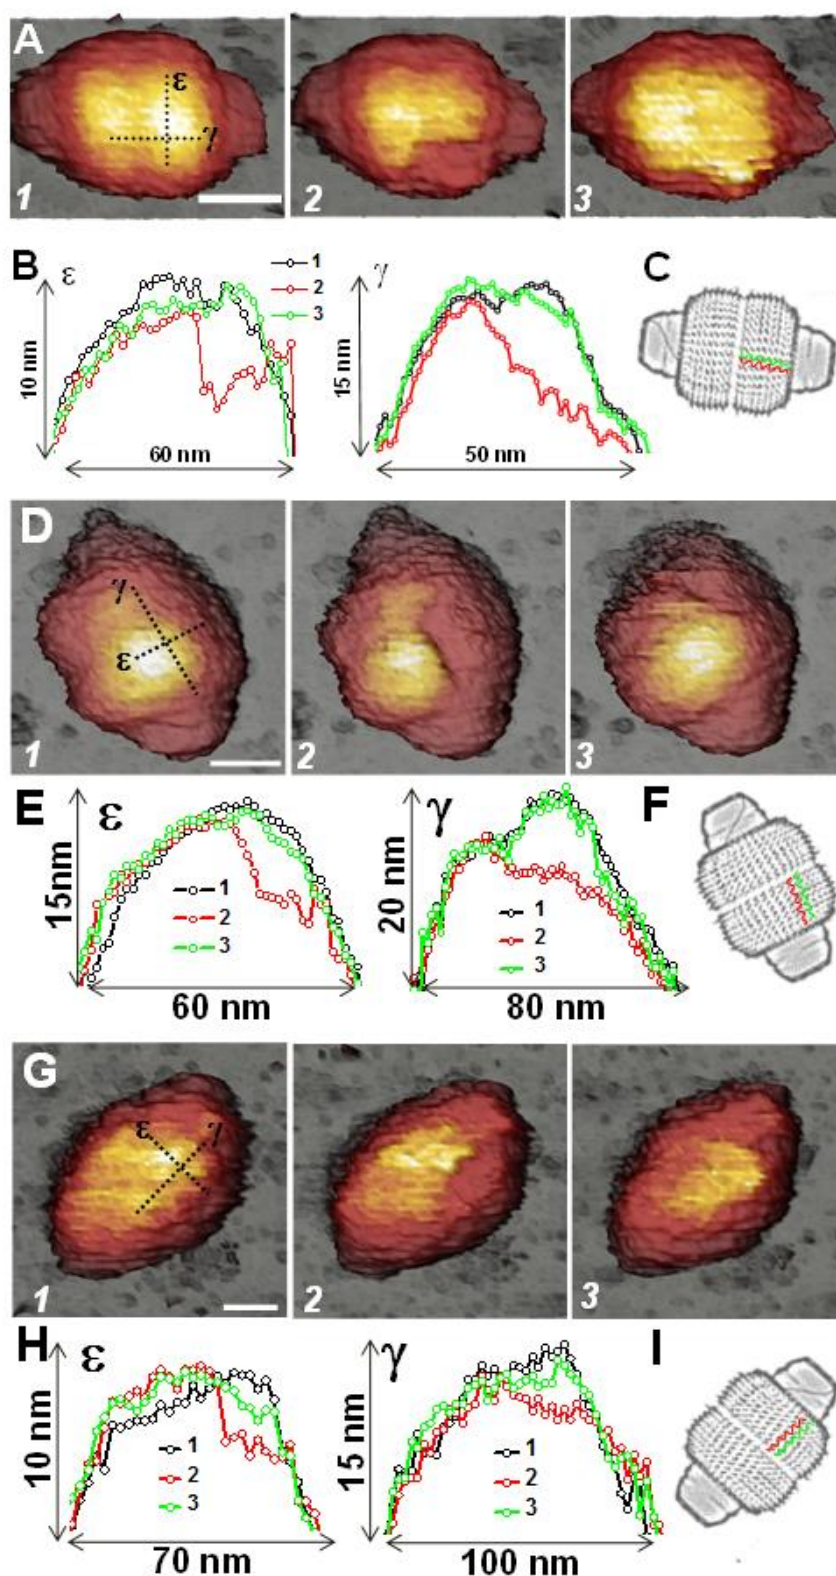

**FIGURE S7. Reversible failure of vaults** (A) Consecutive images of a reclining particle: (1) before the fracture, (2) just after the fracture, and (3) after the recovery. (B) Profiles  $\varepsilon$  and  $\gamma$  depicted with dotted black lines in Figure A1: before the fracture (*black*), after the fracture (*red*), and after the recovery (*green*). (C) Picture showing the line of fracture aligned between two neighboring MVPs (in *red*), with the depressed region highlighted in pink. (D, E, F) and (G, H, I) correspond, respectively, to two more cases of slow reversible fracture.



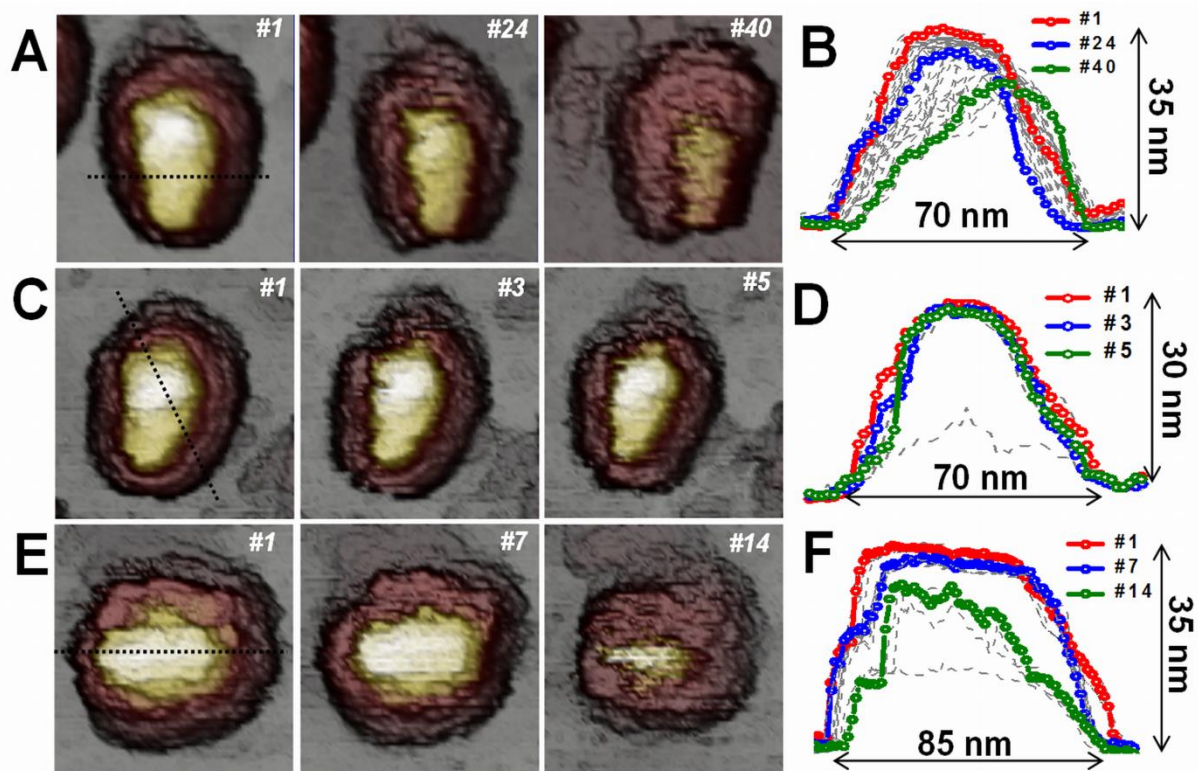

**FIGURE S8. Three cases of fatigue experiments on half-vaults** (A) Evolution of the topographical images of a half-vault imaged at 70 pN. Images are time ordered and labeled with the number of its corresponding frame. In this case, the particle was imaged 40 times, which corresponds to a time of 90 minutes. (B) Evolution of the profile taken along the dotted black line of Figure A-1. The profiles corresponding to frames 1, 24, and 40 are depicted in red, blue, and green, respectively. The rest of the profiles are depicted in grey. (C, D) and (E, F) correspond, respectively, to two more cases. The imaging force for these cases was about 75 pN.

**Movie 1. Mechanical fatigue of a half-vault.** This movie indicates the temporal evolution of figure 6.
